# Supplementary material for: Effects of Protein Supplementation Combined with Resistance Exercise Training on Walking Speed Recovery in Older Adults with Knee Osteoarthritis and Sarcopenia
Source: MDPI journal article supplement (doi:10.3390/nu15071552), 2023-03-23
Supplement: s1 [file s1]

**Table S1.** Exercise progression protocol

| Intensity:<br>level of resistance<br>(Theraband color) | Time progression (week)         |       |                              |       |       |       |       |       |       |       |       |       |
|--------------------------------------------------------|---------------------------------|-------|------------------------------|-------|-------|-------|-------|-------|-------|-------|-------|-------|
|                                                        | 1st                             | 2nd   | 3rd                          | 4th   | 5th   | 6th   | 7th   | 8th   | 9th   | 10th  | 11th  | 12th  |
|                                                        | Supervised<br>exercise training |       | Home-based exercise training |       |       |       |       |       |       |       |       |       |
| Yellow                                                 | X                               | X     |                              |       |       |       |       |       |       |       |       |       |
| Red                                                    |                                 |       | X                            | X     |       |       |       |       |       |       |       |       |
| Green                                                  |                                 |       |                              |       | X     | X     |       |       |       |       |       |       |
| Blue                                                   |                                 |       |                              |       |       |       | X     | X     |       |       |       |       |
| Black                                                  |                                 |       |                              |       |       |       |       |       | X     | X     |       |       |
| Silver                                                 |                                 |       |                              |       |       |       |       |       |       |       | X     | X     |
| Exercise Loading                                       |                                 |       |                              |       |       |       |       |       |       |       |       |       |
| Repetition                                             | 10–20                           | 10–20 | 10–20                        | 10–20 | 10–20 | 10–20 | 10–20 | 10–20 | 10–20 | 10–20 | 10–20 | 10–20 |
| Set                                                    | 3–5                             | 6-10  | 3–5                          | 6-10  | 3–5   | 6-10  | 3–5   | 6-10  | 3–5   | 6-10  | 3–5   | 6-10  |
| RPE <sup>a</sup>                                       | 10–13                           | 10–13 | 10–13                        | 10–13 | 10–13 | 10–13 | 10–13 | 10–13 | 10–13 | 10–13 | 10–13 | 10–13 |

“X” denoted the intensity of resistance which is determined by Theraband color.

<sup>a</sup>Ratings of perceived exertion (RPE) using the Borg scale

**Table S2.** Elastic resistance exercise regime

| Movement                                                                                                                       | Intensity<br>(Repetition/Set) | Targeted<br>muscle group            | Duration<br>(Min) |
|--------------------------------------------------------------------------------------------------------------------------------|-------------------------------|-------------------------------------|-------------------|
| <b>A. Warm-up</b>                                                                                                              |                               |                                     |                   |
| 1. Mobility exercise of the neck, upper limbs, and back                                                                        |                               | Upper quarter flexors and extensors | 5                 |
| 2. Global flexion-extension of the lower limb                                                                                  |                               | Lower quarter flexors and extensors | 5                 |
| <b>B. Upper quarter</b>                                                                                                        |                               |                                     |                   |
| 1. Seated chest press                                                                                                          | 10–20/3                       | Upper quarter extensors             | 5–10              |
| 2. Seated row                                                                                                                  | 10–20/3                       | Upper quarter flexors               | 5–10              |
| 3. Seated shoulder press                                                                                                       | 10–20/3                       | Shoulder girdle muscle groups       | 5–10              |
| <b>C. Lower quarter</b>                                                                                                        |                               |                                     |                   |
| 1. Concentric–eccentric hip circumduction                                                                                      | 10–20/3                       | Hip girdle muscle groups            | 5–10              |
| 2. Leg press                                                                                                                   | 10–20/3                       | Lower quarter extensors             | 5–10              |
| 3. Leg curl                                                                                                                    | 10–20/3                       | Lower quarter flexors               | 5–10              |
| <b>D. Cool down</b>                                                                                                            |                               |                                     |                   |
| 1. Gentle stretching exercise<br>- Arm stretch<br>- Chest stretch<br>- Core stretch                                            |                               | Upper quarter flexors and extensors | 5                 |
| 2 Gentle stretching exercise<br>- Standing quad stretch<br>- Seated single-leg hamstring stretch<br>- Unilateral knee-to-chest |                               | Lower quarter flexors and extensors | 5                 |
